# Supplementary material
Source: Springer Nature journal article supplement (https://www.springermedizin.de/resource/supplementary/12943_2008_385_MOESM13_ESM.pdf/9554102)

Proximal colon

D  
i  
s  
t  
a  
l  
c  
o  
l  
o  
n

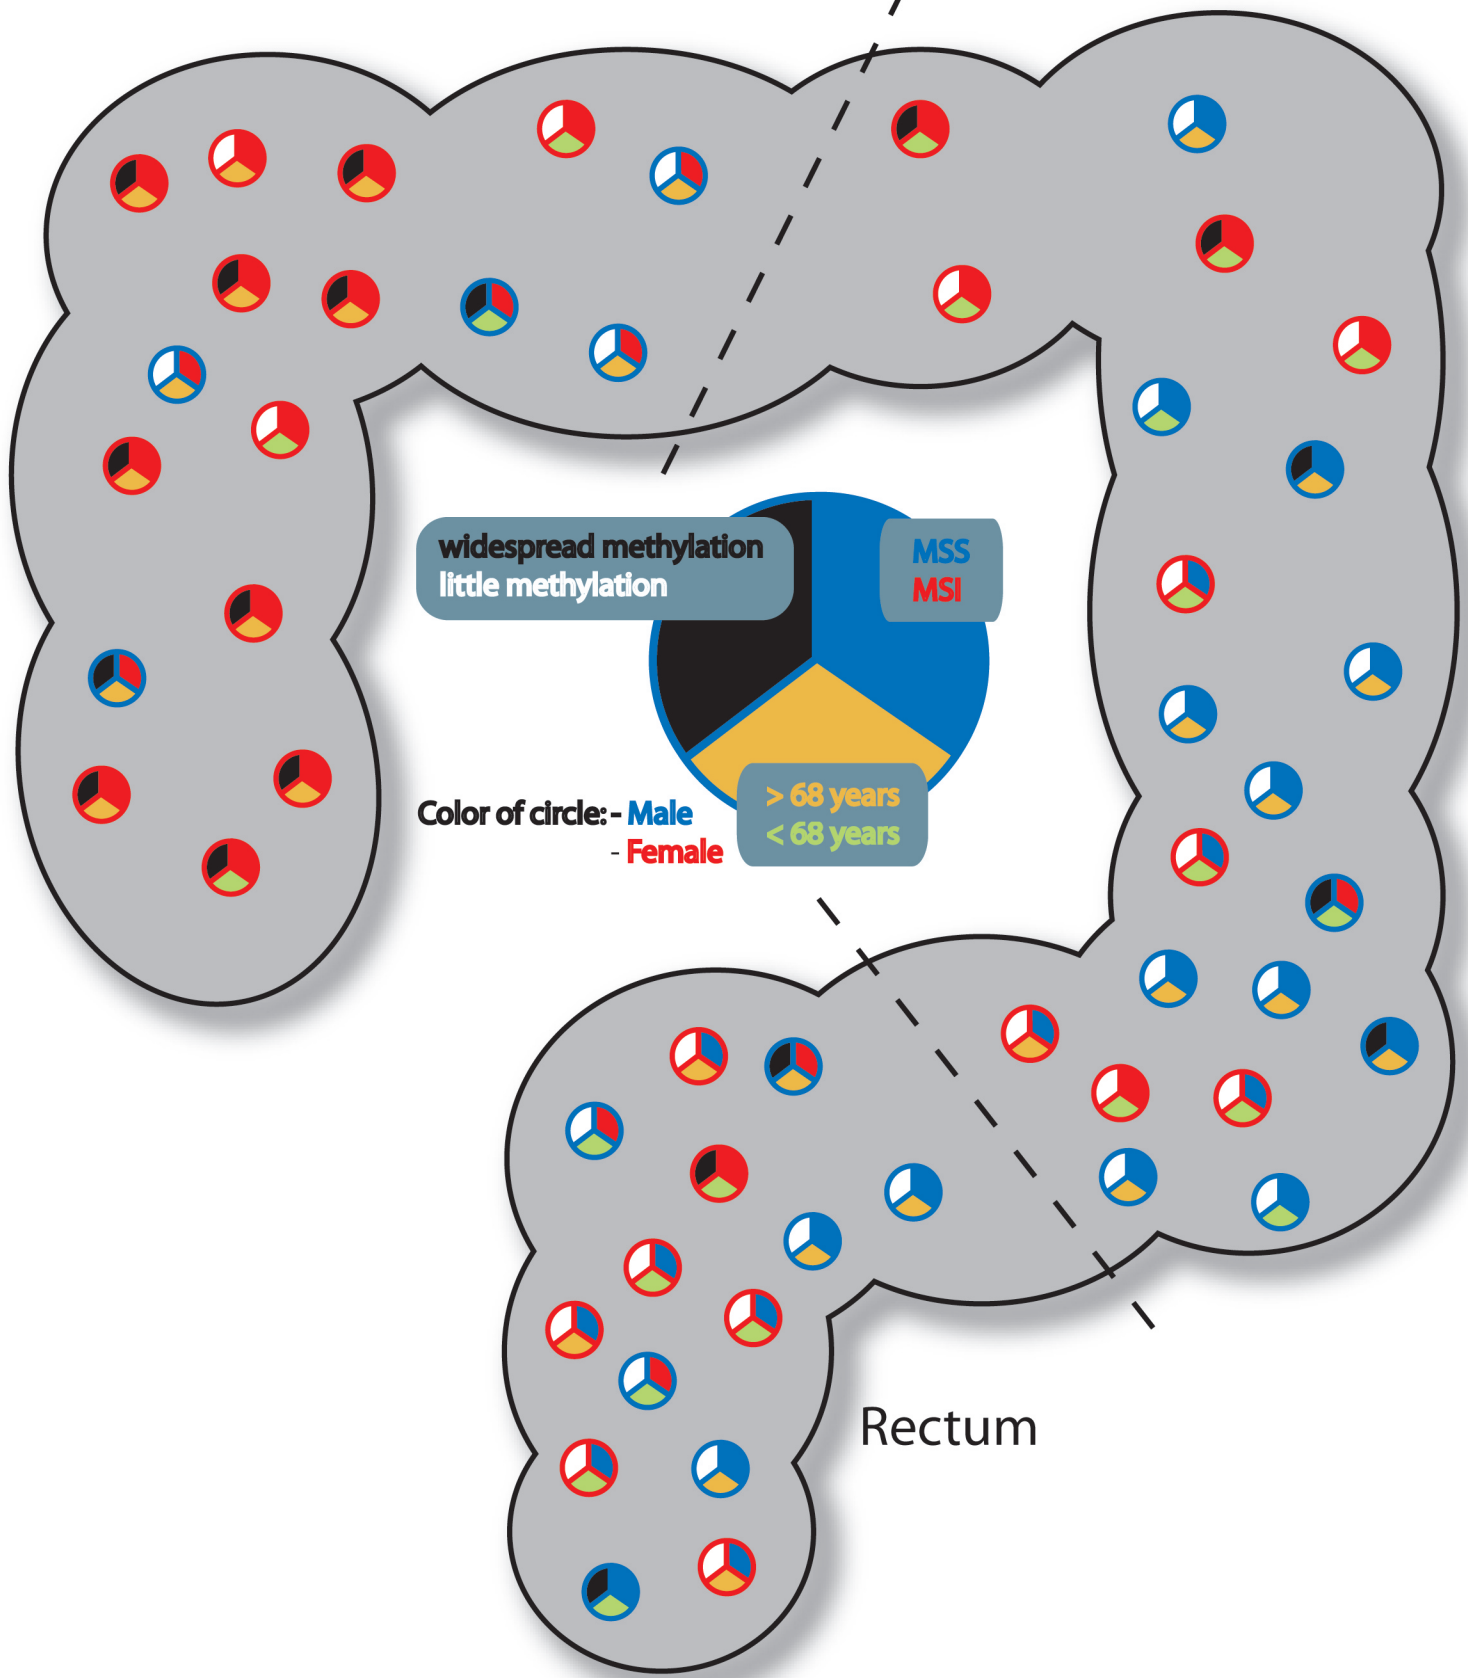

Supplement: MOESM13 [file 9554102]
